# Supplementary material for: Qualitative prediction of blood–brain barrier permeability on a large and refined dataset
Source: PubMed Central journal article supplement — J Comput Aided Mol Des. 2011 Nov 23;25(12):1095–106. doi: 10.1007/s10822-011-9478-1 (PMC3241963; doi:10.1007/s10822-011-9478-1), 2011-11-23
Supplement: 10822_2011_9478_MOESM1_ESM.pdf [file 10822_2011_9478_MOESM1_ESM.pdf]

Table 1: Dataset for experimental logBB values.

| <i>CID</i> | <i>Name</i>           | <i>logBB</i> | <i>Canonical SMILES</i>                                                                               |
|------------|-----------------------|--------------|-------------------------------------------------------------------------------------------------------|
| 11         | 1,2-dichloroethane    | -0.14        | <chem>C(CC)Cl</chem>                                                                                  |
| 180        | acetone               | -0.15        | <chem>CC(=O)C</chem>                                                                                  |
| 241        | benzene               | 0.35         | <chem>C1=CC=CC=C1</chem>                                                                              |
| 263        | 1-butanol             | -0.02        | <chem>CCCCO</chem>                                                                                    |
| 297        | methane               | 0.03         | <chem>C</chem>                                                                                        |
| 338        | salicylic acid        | -1.11        | <chem>C1=CC=C(C(=O)O)C(=O)O</chem>                                                                    |
| 356        | octane                | 0.69         | <chem>CCCCCCCC</chem>                                                                                 |
| 408        | cotinine              | -0.22        | <chem>CN1C(CCC1=O)C2=CN=CC=C2</chem>                                                                  |
| 412        | nornicotine           | 0.32         | <chem>C1CC(NC1)C2=CN=CC=C2</chem>                                                                     |
| 444        | bupropion             | 1.40         | <chem>CC(C(=O)C1=CC(=CC=C1)Cl)NC(C)C</chem>                                                           |
| 702        | ethanol               | -0.16        | <chem>CCO</chem>                                                                                      |
| 887        | methanol              | 0.02         | <chem>CO</chem>                                                                                       |
| 942        | nicotine              | 0.38         | <chem>CN1CCCC1C2=CN=CC=C2</chem>                                                                      |
| 947        | nitrogen              | 0.03         | <chem>N#N</chem>                                                                                      |
| 948        | nitrous oxide         | 0.03         | <chem>N#[N+][O-]</chem>                                                                               |
| 962        | water                 | -0.04        | <chem>O</chem>                                                                                        |
| 1031       | 1-propanol            | -0.15        | <chem>CCCO</chem>                                                                                     |
| 1140       | toluene               | 0.36         | <chem>CC1=CC=CC=C1</chem>                                                                             |
| 1176       | urea                  | -0.14        | <chem>C(=O)(N)N</chem>                                                                                |
| 1206       | pervitin              | 0.95         | <chem>CC(CC1=CC=CC=C1)NC</chem>                                                                       |
| 1345       | PK 11195              | 0.48         | <chem>CCC(C)N(C)C(=O)C1=CC2=CC=CC=C2C(=N1)C3=CC=CC=C3Cl</chem>                                        |
| 1775       | phenytoin             | -0.05        | <chem>C1=CC=C(C=C1)C2(C(=O)NC(=O)N2)C3=CC=CC=C3</chem>                                                |
| 1935       | tacrine               | -0.12        | <chem>C1CCC2=NC3=CC=CC=C3C(=C2C1)N</chem>                                                             |
| 1978       | acebutolol            | -0.15        | <chem>CCCC(=O)NC1=CC(=C(C=C1)OCC(CNC(C)C)O)C(=O)C</chem>                                              |
| 1983       | acetaminophen         | -0.37        | <chem>CC(=O)NC1=CC=C(C=C1)O</chem>                                                                    |
| 2022       | acyclovir             | -0.84        | <chem>C1=NC2=C(N1COCCO)NC(=NC2=O)N</chem>                                                             |
| 2083       | salbutamol            | -1.14        | <chem>CC(C)C)NCC(C1=CC(=C(C=C1)O)CO)O</chem>                                                          |
| 2118       | alprazolam            | 0.02         | <chem>CC1=NN=C2N1C3=C(C=C(C=C3)Cl)C(=NC2)C4=CC=CC=C4</chem>                                           |
| 2119       | alprenolol            | -0.23        | <chem>CC(C)NCC(COC1=CC=CC=C1CC=C)O</chem>                                                             |
| 2153       | theophylline          | -0.32        | <chem>CN1C2=C(C(=O)N(C1=O)C)NC=N2</chem>                                                              |
| 2160       | amitriptyline         | 0.90         | <chem>CN(C)CCC=C1C2=CC=CC=C2CC3=CC=CC=C31</chem>                                                      |
| 2164       | amobarbital           | 0.11         | <chem>CCC1(C(=O)NC(=O)NC1=O)CCC(C)C</chem>                                                            |
| 2206       | antipyrine            | -0.11        | <chem>CC1=CC(=O)N(N1C)C2=CC=CC=C2</chem>                                                              |
| 2244       | aspirin               | -0.61        | <chem>CC(=O)OC1=CC=CC=C1C(=O)O</chem>                                                                 |
| 2249       | atenolol              | -1.14        | <chem>CC(C)NCC(COC1=CC=C(C=C1)CC(=O)N)O</chem>                                                        |
| 2294       | barbital              | -0.14        | <chem>CCC1(C(=O)NC(=O)NC1=O)CC</chem>                                                                 |
| 2337       | benzocaine            | 0.27         | <chem>CCOC(=O)C1=CC=C(C=C1)N</chem>                                                                   |
| 2366       | betahistine           | -0.34        | <chem>CNCCC1=CC=CC=N1</chem>                                                                          |
| 2369       | betaxolol             | 0.39         | <chem>CC(C)NCC(COC1=CC=C(C=C1)CCOCC2CC2)O</chem>                                                      |
| 2381       | biperiden             | 0.85         | <chem>C1CCN(CC1)CCC(C2CC3CC2C=C3)(C4=CC=CC=C4)O</chem>                                                |
| 2443       | bromocriptine         | -1.10        | <chem>CC(C)CC1C(=O)N2CCCC2C3(N1C(=O)C(O3)(C(C)C)NC(=O)C4CN(C5CC6=C(NC7=CC=CC(=C67)C5=C4)Br)C)O</chem> |
| 2448       | bromperidol           | 1.38         | <chem>C1CN(CCC1(C2=CC=C(C=C2)Br)O)CCCC(=O)C3=CC=C(C=C3)F</chem>                                       |
| 2473       | bunitrolol            | 0.38         | <chem>CC(C)C)NCC(COC1=CC=CC=C1C#N)O</chem>                                                            |
| 2477       | buspirone             | 0.49         | <chem>C1CCC2(C1)CC(=O)N(C(=O)C2)CCCCN3CCN(CC3)C4=NC=CC=N4</chem>                                      |
| 2482       | butamben              | 0.42         | <chem>CCCCOC(=O)C1=CC=C(C=C1)N</chem>                                                                 |
| 2519       | caffeine              | -0.04        | <chem>CN1C=NC2=C1C(=O)N(C(=O)N2)C</chem>                                                              |
| 2520       | verapamil             | -0.64        | <chem>CC(C)C(CCCN(C)CCC1=CC(=C(C=C1)OC)OC)(C#N)C2=CC(=C(C=C2)OC)OC</chem>                             |
| 2554       | carbamazepine         | -0.04        | <chem>C1=CC=C2C(=C1)C=CC3=CC=CC=C3N2C(=O)N</chem>                                                     |
| 2555       | carbamazepine epoxide | -0.34        | <chem>C1=CC=C2C(=C1)C3C(O3)C4=CC=CC=C4N2C(=O)N</chem>                                                 |
| 2578       | carmustine            | -0.52        | <chem>C(CC)NC(=O)N(CCC)N=O</chem>                                                                     |
| 2583       | carteolol             | 0.01         | <chem>CC(C)C)NCC(COC1=CC=CC=C1CCC(=O)N2)O</chem>                                                      |
| 2678       | cetirizine            | -2.15        | <chem>C1CN(CCN1CCOCC(=O)O)C(C2=CC=CC=C2)C3=CC=C(C=C3)Cl</chem>                                        |

|      |                  |       |                                                                                              |
|------|------------------|-------|----------------------------------------------------------------------------------------------|
| 2708 | chlorambucil     | -1.70 | <chem>C1=CC(=CC=C1CCCC(=O)O)N(CCC)CCC1</chem>                                                |
| 2726 | chlorpromazine   | 1.02  | <chem>CN(C)CCCN1C2=CC=CC=C2SC3=C1C=C(C=C3)Cl</chem>                                          |
| 2756 | cimetidine       | -1.06 | <chem>CC1=C(N=CN1)CSCCNC(=NC)NC#N</chem>                                                     |
| 2789 | clobazam         | 0.36  | <chem>CN1C(=O)CC(=O)N(C2=C1C=CC(=C2)Cl)C3=CC=CC=C3</chem>                                    |
| 2803 | clonidine        | 0.12  | <chem>C1CN=C(N1)NC2=C(C=CC=C2Cl)Cl</chem>                                                    |
| 2995 | desipramine      | 1.08  | <chem>CNCCCN1C2=CC=CC=C2CCC3=CC=CC=C31</chem>                                                |
| 2997 | nordiazepam      | 0.52  | <chem>C1C(=O)NC2=C(C=C(C=C2)Cl)C(=N1)C3=CC=CC=C3</chem>                                      |
| 3007 | amphetamine      | 0.93  | <chem>CC(CC1=CC=CC=C1)N</chem>                                                               |
| 3016 | diazepam         | 0.47  | <chem>CN1C(=O)CN=C(C2=C1C=CC(=C2)Cl)C3=CC=CC=C3</chem>                                       |
| 3043 | didanosine       | -1.30 | <chem>C1CC(OC1CO)N2C=NC3=C2NC=NC3=O</chem>                                                   |
| 3100 | diphenhydramine  | 1.26  | <chem>CN(C)CCOC(C1=CC=CC=C1)C2=CC=CC=C2</chem>                                               |
| 3121 | valproic acid    | -0.41 | <chem>CCCC(CCC)C(=O)O</chem>                                                                 |
| 3151 | domperidone      | -0.85 | <chem>C1CN(CCC1N2C3=C(C=C(C=C3)Cl)NC2=O)CCCN4C5=CC=CC=C5NC4=O</chem>                         |
| 3152 | donepezil        | 0.89  | <chem>COC1=C(C=C2C(=C1)CC(C2=O)CC3CCN(CC3)CC4=CC=CC=C4)OC</chem>                             |
| 3162 | doxylamine       | 0.64  | <chem>CC(C1=CC=CC=C1)(C2=CC=CC=N2)OCCN(C)C</chem>                                            |
| 3226 | enflurane        | 0.22  | <chem>C(C(OC(F)F)(F)F)(F)Cl</chem>                                                           |
| 3230 | enoxolone        | -1.40 | <chem>CC1(C2CCC3(C(C2(CCC1O)C)C(=O)C=C4C3(CCC5(C4CC(C5)(C)C(=O)O)C)C)C)C</chem>              |
| 3282 | ethenzamide      | -0.05 | <chem>CCOC1=CC=CC=C1C(=O)N</chem>                                                            |
| 3283 | ether            | 0.00  | <chem>CCOCC</chem>                                                                           |
| 3308 | etodolac         | -1.42 | <chem>CCC1=CC=CC2=C1NC3=C2COC3(C)CC(=O)O</chem>                                              |
| 3310 | etoposide        | -2.00 | <chem>CC1OC2C(O1)C(C(C(O2)OC3C4COC(=O)C4C(C5=CC6=C(C=C35)OCO6)C7=CC(=C(C=C7)OC)O)OC)O</chem> |
| 3345 | fentanyl         | 0.59  | <chem>CCC(=O)N(C1CCN(CC1)CCC2=CC=CC=C2)C3=CC=CC=C3</chem>                                    |
| 3348 | fexofenadine     | -0.98 | <chem>CC(C)C1=CC=C(C=C1)C(CCCN2CCC(CC2)C(C3=CC=CC=C3)(C4=CC=CC=C4)O)C(=O)O</chem>            |
| 3372 | triflurmethazine | 1.51  | <chem>C1CN(CCN1CCCN2C3=CC=CC=C3SC4=C2C=C(C=C4)C(F)(F)F)CCO</chem>                            |
| 3373 | flumazenil       | -0.29 | <chem>CCOC(=O)C1=C2CN(C(=O)C3=C(N2C=N1)C=CC(=C3)F)C</chem>                                   |
| 3380 | flunitrazepam    | 0.07  | <chem>CN1C(=O)CN=C(C2=C1C=CC(=C2)[N+](=O)[O-])C3=CC=CC=C3F</chem>                            |
| 3386 | fluoxetine       | 0.72  | <chem>CNCCC(C1=CC=CC=C1)OC2=CC=C(C=C2)C(F)(F)F</chem>                                        |
| 3469 | gentisic acid    | 0.09  | <chem>C1=CC(=C(C=C1O)C(=O)O)O</chem>                                                         |
| 3510 | granisetron      | -0.69 | <chem>CN1C2CCCC1CC(C2)NC(=O)C3=NN(C4=CC=CC=C43)C</chem>                                      |
| 3559 | haloperidol      | 1.33  | <chem>C1CN(CCC1(C2=CC=C(C=C2)Cl)O)CCCC(=O)C3=CC=C(C=C3)F</chem>                              |
| 3562 | halothane        | 0.32  | <chem>C(C(F)(F)F)(Cl)Br</chem>                                                               |
| 3608 | hexobarbital     | 0.03  | <chem>CC1(C(=O)NC(=O)N(C1=O)C)C2=CCCCC2</chem>                                               |
| 3658 | hydroxyzine      | 0.36  | <chem>C1CN(CCN1CCOCCO)C(C2=CC=CC=C2)C3=CC=C(C=C3)Cl</chem>                                   |
| 3672 | ibuprofen        | -0.18 | <chem>CC(C)CC1=CC=C(C=C1)C(C)C(=O)O</chem>                                                   |
| 3676 | lidocaine        | 0.34  | <chem>CCN(CC)CC(=O)NC1=C(C=CC=C1)C</chem>                                                    |
| 3696 | imipramine       | 0.98  | <chem>CN(C)CCCN1C2=CC=CC=C2CCC3=CC=CC=C31</chem>                                             |
| 3715 | indomethacin     | -1.26 | <chem>CC1=C(C2=C(N1C(=O)C3=CC=C(C=C3)Cl)C=CC(=C2)OC)CC(=O)O</chem>                           |
| 3763 | isoflurane       | 0.37  | <chem>C(C(F)(F)F)(OC(F)F)Cl</chem>                                                           |
| 3776 | isopropanol      | -0.15 | <chem>CC(C)O</chem>                                                                          |
| 3878 | lamotrigine      | 0.29  | <chem>C1=CC(=C(C=C1)Cl)Cl)C2=C(N=C(N=N2)N)N</chem>                                           |
| 3955 | loperamide       | 0.77  | <chem>CN(C)C(=O)C(CCN1CCC(CC1)(C2=CC=C(C=C2)Cl)O)(C3=CC=CC=C3)C4=CC=CC=C4</chem>             |
| 3958 | lorazepam        | 0.44  | <chem>C1=CC=C(C=C1)C2=NC(C(=O)NC3=C2C=C(C=C3)Cl)O)Cl</chem>                                  |
| 4046 | mefloquine       | 0.63  | <chem>C1CCNC(C1)C(C2=CC(=NC3=C2C=CC=C3C(F)(F)F)C(F)(F)F)O</chem>                             |
| 4078 | mesoridazine     | -0.28 | <chem>CN1CCCC1CCN2C3=CC=CC=C3SC4=C2C=C(C=C4)S(=O)C</chem>                                    |
| 4112 | methotrexate     | -1.51 | <chem>CN(CC1=CN=C2C(=N1)C(=NC(=N2)N)N)C3=CC=C(C=C3)C(=O)NC(CCC(=O)O)C(=O)O</chem>            |
| 4116 | methoxyflurane   | 0.23  | <chem>COC(C(C)Cl)(F)F</chem>                                                                 |
| 4171 | metoprolol       | 1.15  | <chem>CC(C)NCC(COC1=CC=C(C=C1)CCOC)O</chem>                                                  |
| 4184 | mianserin        | 0.99  | <chem>CN1CCN2C(C1)C3=CC=CC=C3CC4=CC=CC=C42</chem>                                            |
| 4192 | midazolam        | 0.37  | <chem>CC1=NC=C2N1C3=C(C=C(C=C3)Cl)C(=NC2)C4=CC=CC=C4F</chem>                                 |
| 4205 | mirtazapine      | 0.53  | <chem>CN1CCN2C(C1)C3=CC=CC=C3CC4=C2N=CC=C4</chem>                                            |
| 4421 | nalidixic acid   | -0.66 | <chem>CCN1C=C(C(=O)C2=C1N=C(C=C2)C)C(=O)O</chem>                                             |
| 4463 | nevirapine       | 0.00  | <chem>CC1=C2C(=NC=C1)N(C3=C(C=CC=N3)C(=O)N2)C4CC4</chem>                                     |
| 4585 | olanzapine       | 0.78  | <chem>CC1=CC2=C(C(NC3=CC=CC=C3N=C2S1)N4CCN(CC4)C</chem>                                      |
| 4594 | omeprazole       | -0.82 | <chem>CC1=CN=C(C(=C1OC)C)CS(=O)C2=NC3=C(N2)C=C(C=C3)OC</chem>                                |
| 4616 | oxazepam         | 0.60  | <chem>C1=CC=C(C=C1)C2=NC(C(=O)NC3=C2C=C(C=C3)Cl)O</chem>                                     |

|      |                      |       |                                                                                                                      |
|------|----------------------|-------|----------------------------------------------------------------------------------------------------------------------|
| 4687 | paraxanthine         | 0.07  | CN1C=NC2=C1C(=O)N(C(=O)N2)C                                                                                          |
| 4736 | pentazocine          | 0.51  | CC1C2CC3=C(C1(CCN2CC=C(C)C)C)C=C(C=C3)O                                                                              |
| 4737 | pentobarbital        | 0.08  | CCCC(C)C1(C(=O)NC(=O)NC1=O)CC                                                                                        |
| 4781 | phenylbutazone       | -0.52 | CCCCC1C(=O)N(N(C1=O)C2=CC=CC=C2)C3=CC=CC=C3                                                                          |
| 4828 | pindolol             | -0.14 | CC(C)NCC(COC1=CC=CC=C1C=CN2)O                                                                                        |
| 4909 | primidone            | -0.07 | CCC1(C(=O)NCNC1=O)C2=CC=CC=C2                                                                                        |
| 4914 | procaine             | 0.05  | CCN(CC)CCOC(=O)C1=CC=C(C=C1)N                                                                                        |
| 4926 | promazine            | 1.08  | CN(C)CCCN1C2=CC=CC=C2SC3=CC=CC=C31                                                                                   |
| 4943 | propofol             | 0.63  | CC(C)C1=C(C(=CC=C1)C(C)C)O                                                                                           |
| 4946 | propranolol          | 0.84  | CC(C)NCC(COC1=CC=CC2=CC=CC=C21)O                                                                                     |
| 4992 | pyrilamine           | 0.49  | CN(C)CCN(CC1=CC=C(C=C1)OC)C2=CC=CC=N2                                                                                |
| 5039 | ranitidine           | -1.23 | CNC(=[N+])(=O)[O-]NCCSCC1=CC=C(O1)CN(C)C                                                                             |
| 5064 | ribavirin            | -0.67 | C1=NC(=NN1C2C(C(C(O2)CO)O)O)C(=O)N                                                                                   |
| 5073 | risperidone          | -0.02 | CC1=C(C(=O)N2CCCC2=N1)CCN3CCC(CC3)C4=NOC5=C4C=CC(=C5)F                                                               |
| 5092 | rolipram             | 0.61  | COC1=C(C=C(C=C1)C2CC(=O)NC2)OC3CCCC3                                                                                 |
| 5095 | ropinirole           | 0.08  | CCCN(CCC)CCC1=C2CC(=O)NC2=CC=C1                                                                                      |
| 5142 | S-methyl-isothiourea | -0.60 | CSC(=N)N                                                                                                             |
| 5155 | stavudine            | -0.48 | CC1=CN(C(=O)NC1=O)C2C=CC(O2)CO                                                                                       |
| 5184 | scopolamine          | 0.23  | CN1C2CC(C1C3C2O3)OC(=O)C(CO)C4=CC=CC=C4                                                                              |
| 5193 | secobarbital         | 0.20  | CCCC(C)C1(C(=O)NC(=O)NC1=O)CC=C                                                                                      |
| 5206 | sevoflurane          | 0.30  | C(OC(C(F)F)F)C(F)F)F                                                                                                 |
| 5253 | sotalol              | -0.28 | CC(C)NCC(C1=CC=C(C=C1)NS(=O)(=O)C)O                                                                                  |
| 5265 | spiperone            | 0.26  | C1CN(CCC12C(=O)NCN2C3=CC=CC=C3)CCCC(=O)C4=CC=C(C=C4)F                                                                |
| 5402 | terbinafine          | 0.08  | CC(C)(C)C#CC=CCN(C)CC1=CC=CC2=CC=CC=C21                                                                              |
| 5405 | terfenadine          | 0.64  | CC(C)(C)C1=CC=C(C=C1)C(CCCN2CCC(CC2)C(C3=CC=CC=C3)(C4=CC=CC=C4)O)O                                                   |
| 5416 | krypton              | -0.16 | [Kr]                                                                                                                 |
| 5429 | theobromine          | -0.29 | CN1C=NC2=C1C(=O)NC(=O)N2C                                                                                            |
| 5452 | thioridazine         | 0.26  | CN1CCCCC1CCN2C3=CC=CC=C3SC4=C2C=C(C=C4)SC                                                                            |
| 5538 | tretinoin            | -0.49 | CC1=C(C(CCC1)(C)C)C=CC(=CC=CC(=O)O)C)C                                                                               |
| 5556 | triazolam            | 0.67  | CC1=NN=C2N1C3=C(C=C(C=C3)C1)C(=NC2)C4=CC=CC=C4C1                                                                     |
| 5566 | trifluoperazine      | 1.43  | CN1CCN(CC1)CCCN2C3=CC=CC=C3SC4=C2C=C(C=C4)C(F)F)F                                                                    |
| 5568 | triflupromazine      | 1.44  | CN(C)CCCN1C2=CC=CC=C2SC3=C1C=C(C=C3)C(F)F)F                                                                          |
| 5726 | zidovudine           | -0.74 | CC1=CN(C(=O)NC1=O)C2CC(C(O2)CO)N=[N+]=[N-]                                                                           |
| 5732 | zolpidem             | -0.48 | CC1=CC=C(C=C1)C2=C(N3C=C(C=C3=N2)C)CC(=O)N(C)C                                                                       |
| 5760 | cocaine              | 0.60  | CN1C2CCC1C(C2)OC(=O)C3=CC=CC=C3)C(=O)OC                                                                              |
| 5809 | scopolamine          | 0.23  | CN1C2CC(C1C3C2O3)OC(=O)C(CO)C4=CC=CC=C4                                                                              |
| 5917 | pentylenetetrazol    | -0.03 | C1CCC2=NN=NN2CC1                                                                                                     |
| 5953 | quinidine            | -0.21 | COC1=CC2=C(C=C(CN=C2C=C1)C(C3CC4CCN3CC4C=C)O                                                                         |
| 5978 | vincristine          | -1.03 | CCC1(CC2CC(C3=C(CCN(C2)C1)C4=CC=CC=C4N3)(C5=C(C=C6C(=C5)C78CCN9C7C(C=CC9)(C(C8N6C=O)(C(=O)OC)O)OC(=O)C)CC)OC(=O)OC)O |
| 5983 | physostigmine        | 0.08  | CC12CCN(C1N(C3=C2C=C(C=C3)OC(=O)NC)C)C                                                                               |
| 6009 | aminophenazone       | 0.00  | CC1=C(C(=O)N(N1C)C2=CC=CC=C2)N(C)C                                                                                   |
| 6047 | levodopa             | -0.78 | C1=CC(=C(C=C1)CC(C(=O)O)N)O)O                                                                                        |
| 6085 | AR 1D9859            | 0.31  | CCCCN1CC2CC3=CC(=C(C=C3C2C1)OC)OC.Cl                                                                                 |
| 6212 | trichloromethane     | 0.26  | C(Cl)(Cl)Cl                                                                                                          |
| 6251 | D-mannitol           | -1.60 | C(C(C(C(CO)O)O)O)O)O                                                                                                 |
| 6276 | 1-pentanol           | 0.20  | CCCCCO                                                                                                               |
| 6278 | methylchloroform     | 0.24  | CC(Cl)(Cl)Cl                                                                                                         |
| 6344 | methylenchloride     | -0.17 | C(Cl)Cl                                                                                                              |
| 6348 | carbon bisulfide     | 0.60  | C(=S)=S                                                                                                              |
| 6351 | trimethylene         | 0.03  | C1CC1                                                                                                                |
| 6354 | oxirane              | 0.01  | C1CO1                                                                                                                |
| 6358 | 2-bromopropane       | 0.56  | CC(C)Br                                                                                                              |
| 6365 | ethylidene chloride  | -0.28 | CC(Cl)Cl                                                                                                             |
| 6386 | tert-butylalcohol    | 0.11  | CC(C)(C)O                                                                                                            |
| 6403 | hexane               | 1.03  | CCC(C)(C)C                                                                                                           |

|       |                            |       |                                                                  |
|-------|----------------------------|-------|------------------------------------------------------------------|
| 6405  | amylene hydrate            | 0.07  | <chem>CCC(C)(C)O</chem>                                          |
| 6408  | chlorotrifluoroethane      | -0.08 | <chem>C(C(F)(F)F)Cl</chem>                                       |
| 6468  | phencyclidine              | 0.58  | <chem>C1CCCC(CC1)(C2=CC=CC=C2)N3CCCCC3</chem>                    |
| 6473  | butethal                   | 0.19  | <chem>CCCCC1(C(=O)NC(=O)NC1=O)CC</chem>                          |
| 6560  | isobutanol                 | -0.17 | <chem>CC(C)CO</chem>                                             |
| 6569  | 2-butanone                 | -0.07 | <chem>CCC(=O)C</chem>                                            |
| 6574  | vinyltrichloride           | -0.10 | <chem>C(C(Cl)Cl)Cl</chem>                                        |
| 6575  | trichloroethene            | 0.30  | <chem>C(=C(Cl)Cl)Cl</chem>                                       |
| 6584  | methylacetate              | -0.13 | <chem>CC(=O)OC</chem>                                            |
| 6623  | bisphenol A                | -0.12 | <chem>CC(C)(C1=CC=C(C=C1)O)C2=CC=C(C=C2)O</chem>                 |
| 7174  | risocaine                  | 0.55  | <chem>CCCCO(C(=O)C1=CC=C(C=C1)N</chem>                           |
| 7237  | o-xylene                   | 0.39  | <chem>CC1=CC=CC=C1C</chem>                                       |
| 7247  | pseudocumene               | 0.16  | <chem>CC1=CC=C(C(C=C1)C)C</chem>                                 |
| 7282  | 3-methylpentane            | 1.01  | <chem>CCC(C)CC</chem>                                            |
| 7296  | methylcyclopentane         | 0.93  | <chem>CC1CCCC1</chem>                                            |
| 7366  | tert-butylbenzene          | 0.43  | <chem>CC(C)(C)C1=CC=CC=C1</chem>                                 |
| 7394  | 4-chlorobenzotrifluoride   | 0.17  | <chem>C1=CC(=CC=C1C(F)(F)F)Cl</chem>                             |
| 7500  | ethylbenzene               | 0.22  | <chem>CC1=CC=CC=C1</chem>                                        |
| 7501  | vinylbenzene               | 0.45  | <chem>C=CC1=CC=CC=C1</chem>                                      |
| 7558  | propylhexedrine            | 1.08  | <chem>CC(CCC1CCCC1)NC</chem>                                     |
| 7809  | p-xylene                   | 0.33  | <chem>CC1=CC=C(C=C1)C</chem>                                     |
| 7840  | N-propylbromide            | 0.27  | <chem>CCCBr</chem>                                               |
| 7845  | divinyl                    | -0.17 | <chem>C=CC=C</chem>                                              |
| 7855  | acrylonitrile              | -0.40 | <chem>C=CC#N</chem>                                              |
| 7859  | 2-propyn-1-ol              | -0.23 | <chem>C#CCO</chem>                                               |
| 7892  | isohexane                  | 0.98  | <chem>CCCC(C)C</chem>                                            |
| 7895  | 2-pentanone                | -0.01 | <chem>CCCC(=O)C</chem>                                           |
| 7915  | isopropyl acetate          | 0.40  | <chem>CC(C)OC(=O)C</chem>                                        |
| 7929  | m-xylene                   | 0.28  | <chem>CC1=CC(=CC=C1)C</chem>                                     |
| 7962  | cyclohexylmethane          | 0.96  | <chem>CC1CCCCC1</chem>                                           |
| 7997  | propyl acetate             | 0.12  | <chem>CCCOC(=O)C</chem>                                          |
| 8003  | n-pentane                  | 0.75  | <chem>CCCCC</chem>                                               |
| 8038  | isobutyl acetate           | 0.45  | <chem>CC(C)COC(=O)C</chem>                                       |
| 8058  | n-hexane                   | 0.78  | <chem>CCCCCC</chem>                                              |
| 8078  | cyclohexane                | 0.96  | <chem>C1CCCCC1</chem>                                            |
| 8125  | 1-octene                   | 0.74  | <chem>CCCCCCC=C</chem>                                           |
| 8141  | n-nonane                   | 0.52  | <chem>CCCCCCCC</chem>                                            |
| 8252  | propene                    | -0.06 | <chem>CC=C</chem>                                                |
| 8522  | iodophenazone              | -0.10 | <chem>CC1=C(C(=O)N(N1C)C2=CC=CC=C2)I</chem>                      |
| 8723  | sec-butylcarbinol          | 0.04  | <chem>CCC(C)CO</chem>                                            |
| 8857  | ethyl acetate              | 0.00  | <chem>CCOC(=O)C</chem>                                           |
| 8900  | heptane                    | 0.76  | <chem>CCCCCCC</chem>                                             |
| 8942  | ortal                      | 0.36  | <chem>CCCCCCC1(C(=O)NC(=O)NC1=O)CC</chem>                        |
| 9034  | methohexitone              | -0.07 | <chem>CCC#CC(C)C1(C(=O)NC(=O)N(C1=O)C)CC=C</chem>                |
| 9651  | galanthamine               | 0.32  | <chem>CN1CCC23C=CC(CC2OC4=C(C=CC(=C34)C1)OC)O</chem>             |
| 9664  | 1,1-difluorochloroethylene | -0.02 | <chem>C(=C(F)F)Cl</chem>                                         |
| 9844  | fluoromar                  | 0.13  | <chem>C=COCC(F)(F)F</chem>                                       |
| 10253 | salicylurate               | -0.44 | <chem>C1=CC=C(C(C=C1)C(=O)NCC(=O)O)O</chem>                      |
| 10836 | metamphetamine             | 0.93  | <chem>CC(CC1=CC=CC=C1)NC</chem>                                  |
| 11416 | hexahydro-o-xylene         | 1.07  | <chem>CC1CCCCC1C</chem>                                          |
| 11507 | 2-ethylpentane             | 0.90  | <chem>CCCC(C)CC</chem>                                           |
| 11594 | 2-methylheptane            | 0.86  | <chem>CCCCC(C)C</chem>                                           |
| 12348 | pentyl acetate             | 0.40  | <chem>CCCCCOC(=O)C</chem>                                        |
| 12418 | 1,1,1,2-tetrachloroethane  | 0.33  | <chem>C(C(Cl)(Cl)Cl)Cl</chem>                                    |
| 12512 | tert-butylethylether       | 0.22  | <chem>CCOC(C)(C)C</chem>                                         |
| 12598 | butaperazine               | 0.83  | <chem>CCCC(=O)C1=CC=C(C(C=C1)SC3=CC=CC=C3N2CCCN4CCN(CC4)C</chem> |

|       |                                             |       |                                                                                                                      |
|-------|---------------------------------------------|-------|----------------------------------------------------------------------------------------------------------------------|
| 13342 | vinblastine                                 | -0.07 | CCC1(CC2CC(C3=C(CCN(C2)C1)C4=CC=CC=C4N3)(C5=C(C=C6C(=C5)C78CCN9C7C(C=CC9)(C(C8N6C)(C(=O)OC)O)OC(=O)C)CC)OC)C(=O)OC)O |
| 13379 | 2-methylnonane                              | 1.05  | CCCCCCCC(C)C                                                                                                         |
| 13381 | 1-decene                                    | 0.96  | CCCCCCCC=C                                                                                                           |
| 15413 | tert-butylmethylether                       | 0.36  | CC(C)(C)OC                                                                                                           |
| 15600 | decane                                      | 0.67  | CCCCCCCCC                                                                                                            |
| 17358 | elegas                                      | 0.37  | FS(F)(F)(F)F                                                                                                         |
| 18047 | toliprolol                                  | 0.34  | CC1=CC(=CC=C1)OCC(CNC(C)C)O                                                                                          |
| 18508 | t-butylcyclohexane                          | 0.61  | CC(C)(C)C1CCCCC1                                                                                                     |
| 18591 | isononane                                   | 0.98  | CCCCCCC(C)C                                                                                                          |
| 22407 | cytosine                                    | -1.09 | C1C2CNCC1C3=CC=CC(=O)N3C2                                                                                            |
| 23935 | neon                                        | 0.20  | [Ne]                                                                                                                 |
| 23968 | argon                                       | 0.03  | [Ar]                                                                                                                 |
| 23991 | xenon                                       | 0.07  | [Xe]                                                                                                                 |
| 24066 | zalcitabine                                 | -1.18 | C1CC(OC1CO)N2C=CC(=NC2=O)N                                                                                           |
| 28315 | desmonomethylpromazine                      | 0.59  | CNCCCN1C2=CC=CC=C2SC3=CC=CC=C31                                                                                      |
| 30322 | digoxin                                     | -1.23 | CC1C(C(C(C(1)OC2C(C(C2O)OC3C(OC(CC3O)OC4CCC5(C(C4)CCC6C5CC(C7(C6(CCC7C8=C(C(=O)OC8)O)C)O)C)C)O)O                     |
| 31272 | butyl acetate                               | 0.28  | CCCCOC(=O)C                                                                                                          |
| 31276 | isopentyl acetate                           | 0.55  | CC(C)CCOC(=O)C                                                                                                       |
| 31285 | 1-nonene                                    | 0.86  | CCCCCCCC=C                                                                                                           |
| 31300 | tefluranum                                  | 0.27  | C(C(F)(F)F)(F)Br                                                                                                     |
| 31373 | perchloroethylene                           | 0.37  | C(=C(Cl)Cl)(Cl)Cl                                                                                                    |
| 31423 | pyrene                                      | 0.23  | C1=CC2=C3C(=C1)C=CC4=CC=CC(=C43)C=C2                                                                                 |
| 31703 | doxorubicin                                 | -0.83 | CC1C(C(C(C(1)OC2CC(CC3=C(C4=C(C(=C23)O)C(=O)C5=C(C4=O)C=CC=C5OC)O)(C(=O)CO)O)N)O                                     |
| 31765 | sulforidazine                               | 0.18  | CN1CCCC1CCN2C3=CC=CC=C3SC4=C2C=C(C=C4)S(=O)(=O)C                                                                     |
| 33039 | alovudine                                   | -0.59 | CC1=CN(C(=O)NC1=O)C2CC(C(O)CO)F                                                                                      |
| 37614 | miloxacin                                   | -0.92 | CON1C=C(C(=O)C2=CC3=C(C=C21)OCO3)C(=O)O                                                                              |
| 42113 | suprane                                     | 0.11  | C(C(F)(F)F)(OC(F)F)F                                                                                                 |
| 43473 | 5-ethyl-5-heptyl-1,3-diazinane-2,4,6-trione | 0.02  | CCCCCCCC1(C(=O)NC(=O)NC1=O)CC                                                                                        |
| 46516 | 5-ethyl-5-propyl-1,3-diazinane-2,4,6-trione | 0.09  | CCCC1(C(=O)NC(=O)NC1=O)CC                                                                                            |
| 47811 | pergolide                                   | 0.30  | CCCN1CC(C2C1CC3=CNC4=CC=CC2=C34)CSC                                                                                  |
| 50287 | tiotidine                                   | -0.82 | CN=C(NCCSCC1=CSC(=N1)N=C(N)N)NC#N                                                                                    |
| 51670 | lupitidine                                  | -1.06 | CC1=NC=C(C=C1)CC2=CN=C(NC2=O)NCCSCC3=CC=C(O3)C(C)(C)N.Cl.Cl.Cl                                                       |
| 51671 | lupitidinum                                 | -1.06 | CC1=NC=C(C=C1)CC2=CN=C(NC2=O)NCCSCC3=CC=C(O3)C(C)(C)N                                                                |
| 53024 | yamatetan                                   | -1.89 | CN1C(=NN=N1)SCC2=C(N3C(C(C3=O)(NC(=O)C4SC(=C(C(=O)N)C(=O)[O-])S4)OC)SC2)C(=O)[O-].[Na+].[Na+]                        |
| 53025 | cefotetan                                   | -1.89 | CN1C(=NN=N1)SCC2=C(N3C(C(C3=O)(NC(=O)C4SC(=C(C(=O)N)C(=O)[O-])S4)OC)SC2)C(=O)O                                       |
| 55482 | temelastine                                 | -1.88 | CC1=NC=C(C=C1)CC2=CN=C(NC2=O)NCCCC3=NC=C(C=C3C)Br                                                                    |
| 57347 | flesinoxan                                  | -0.45 | C1CN(CCN1CCNC(=O)C2=CC=C(C=C2)F)C3=C4C(=CC=C3)OC(CO4)CO                                                              |
| 60944 | indinavir                                   | -0.74 | CC(C)(C)NC(=O)C1CN(CCN1CC(C2=CC=CC=C2)C(=O)NC3C(CC4=CC=CC=C34)O)O)CC5=CN=CC=C5                                       |
| 60949 | apaxifylline                                | -1.40 | CCCN1C2=C(C(=O)N(C1=O)CCC)NC(=N2)C3CCC(=O)C3                                                                         |
| 61247 | tert-amylmethylether                        | 0.17  | CCC(C)(C)OC                                                                                                          |
| 62761 | thoron                                      | -0.12 | [Rn]                                                                                                                 |
| 62875 | norchlorpromazine                           | 1.38  | CNCCCN1C2=CC=CC=C2SC3=C1C=C(C=C3)Cl                                                                                  |
| 64142 | nelfinavir mesylate                         | -0.93 | CC1=C(C=CC=C1O)C(=O)NC(CSC2=CC=CC=C2)C(CN3CC4CCCC4CC3C(=O)NC(C)C)O.CS(=O)(=O)O                                       |
| 64143 | nelfinavir                                  | -0.93 | CC1=C(C=CC=C1O)C(=O)NC(CSC2=CC=CC=C2)C(CN3CC4CCCC4CC3C(=O)NC(C)C)O                                                   |
| 64814 | 3-hydroxy-3-phenylpentamide                 | 0.04  | CCC(CC(=O)N)(C1=CC=CC=C1)O                                                                                           |
| 65016 | amprenavir                                  | -0.56 | CC(C)CN(CC(C(C1=CC=CC=C1)NC(=O)OC2CCOC2)O)S(=O)(=O)C3=CC=C(C=C3)N                                                    |
| 66724 | 4-carboxybiphenyl                           | -1.26 | C1=CC=C(C=C1)C2=CC=C(C=C2)C(=O)O                                                                                     |
| 67101 | 16a-fluoroestradiol                         | -0.30 | CC12CCC3(C1CC(C2O)F)CCC4=C3C=CC(=C4)O                                                                                |
| 68617 | sertraline                                  | 1.60  | CN1CCC(C2=CC=CC=C2)C3=CC(=C(C=C3)Cl)Cl                                                                               |
| 69460 | kusol                                       | 0.67  | C1CC2=CC=CC=C2NC1                                                                                                    |
| 72108 | icotidine                                   | -2.00 | CC1=NC=C(C=C1)CC2=CN=C(NC2=O)NCCCC3=C(C=CC=N3)OC                                                                     |
| 74981 | didemethylchlorpromazine                    | 0.97  | C1=CC=C2C(=C1)N(C3=C(S2)C=CC(=C3)Cl)CCCN                                                                             |
| 77501 | 1,4-divinyloxybutane                        | 0.12  | C=COCCCCOC=C                                                                                                         |
| 77991 | rivastigmine                                | 0.88  | CCN(C)C(=O)OC1=CC=CC(=C1)C(C)N(C)C                                                                                   |



(C)C)C

|          |                                 |       |                                                                          |
|----------|---------------------------------|-------|--------------------------------------------------------------------------|
| 7138787  | ZINC 04226975                   | -0.87 | <chem>C1=CC=C(C=C1)C2=CSC(=N2)CC[NH3+]</chem>                            |
| 9796408  | CHEBI: 568657                   | 1.64  | <chem>C1CN(CCN1)C2=NC(=C(C=C2)C(F)F)FCl</chem>                           |
| 9861160  | CID 9861160                     | 0.00  | <chem>C=CCC(C1=CC=CC=C1C2=NOCC3=CC=CC=C32)N</chem>                       |
| 9864749  | CHEBI: 167165                   | 1.13  | <chem>C1CN(CCC1COC2=CC=C(C=C2)C#N)CC=Cl</chem>                           |
| 9903970  | org 5222                        | 1.03  | <chem>CN1CC2C(C1)C3=C(C=CC(=C3)Cl)OC4=CC=CC=C24</chem>                   |
| 9907401  | CHEBI: 568728                   | 0.16  | <chem>C1CC(=O)N(C1)CCCCN2CCN(CC2)C3=NC=CC(=C3)C(F)F</chem>               |
| 9971484  | CHEBI: 338581                   | -0.46 | <chem>CC(=O)NCCCOC1=CC=CC(=C1)CN2CCCC2</chem>                            |
| 10011896 | 2-(2-fluoro-ethyl)-isothiourea  | -0.27 | <chem>C(CSC(=N)N)F</chem>                                                |
| 10019237 | CHEBI: 338033                   | 0.69  | <chem>C1CCN(CC1)CC2=CC(=CC=C2)OCCNC3=CC=CC=N3</chem>                     |
| 10091748 | CHEBI: 338584                   | -1.82 | <chem>CC(CO)(C1=NC(=NO1)C2=C3CN(C(=O)C4=C(N3C=N2)C=CC=C4Cl)C)O</chem>    |
| 10313352 | CID 10313352                    | 0.05  | <chem>CC(C)C([N+](=CC1=CC=CC=C1)[O-])</chem>                             |
| 10352163 | MOL001288                       | -0.24 | <chem>C1=CN(C(=N1)[N+](=O)[O-])CCCF</chem>                               |
| 10377120 | MOL001285                       | -0.17 | <chem>C1=CN(C(=N1)[N+](=O)[O-])CCCCCCCCF</chem>                          |
| 10384745 | CHEBI: 338585                   | -1.34 | <chem>CC(C)C1=NC(=NO1)C2=C3CN(C(=O)C4=C(N3C=N2)C=CC=C4Cl)C)O</chem>      |
| 10444765 | CHEBI: 338140                   | -0.02 | <chem>C1CCN(CC1)CC2=CC(=CC=C2)OCCCO</chem>                               |
| 10451635 | CID 10451635                    | 0.18  | <chem>C1=CC(=C(C=C1)C2=NC3=C(S2)C=C(C=C3)O)I)N</chem>                    |
| 11115931 | 3-methylhexane                  | 0.90  | <chem>CC[CH][C]([CH2])CC</chem>                                          |
| 12780299 | CHEBI: 385616                   | 0.98  | <chem>C1CCN(CC1)CC2=CC(=C(C=C2)I)CN3CCCC3</chem>                         |
| 12889418 | CHEBI: 163710                   | -1.17 | <chem>CN(C)C1=NC=CC(=C1)C2=NC(=NN2)N</chem>                              |
| 13720676 | CHEBI: 287982                   | 1.01  | <chem>CCCCCN1CCN(CC1)C2=CC=C(C=C2)I</chem>                               |
| 13755681 | 5-octyl-5-ethyl barbituric acid | 0.24  | <chem>CCCCCCCC1(C(=O)NC(=O)NC1=O)CC</chem>                               |
| 14022480 | CHEBI: 339093                   | -0.67 | <chem>C1=CC(=C(N=C1)CSCCNC2=C(C=CN2)[N+](=O)[O-])Br</chem>               |
| 14022481 | CHEBI: 339092                   | -0.66 | <chem>C1=CC=NC(=C1)CSCCNC2=C(C=CN2)[N+](=O)[O-]</chem>                   |
| 14022483 | CHEBI: 337303                   | -0.12 | <chem>C1=CC=C(C=C1)CC2=CNC(=C2[N+](=O)[O-])NCCSCC3=CC=CC=N3</chem>       |
| 14022484 | CHEBI: 338035                   | -0.73 | <chem>CN(C)CC1=CC=C(O1)CSCCNC2=C(C(=CN2)CC3=CC=CC=C3)[N+](=O)[O-]</chem> |
| 14022497 | CHEBI: 338961                   | 0.44  | <chem>C1CCN(CC1)CC2=CC(=CC=C2)OCCNC3=NC=CS3</chem>                       |
| 14022499 | CHEBI: 339055                   | 0.22  | <chem>C1CCN(CC1)CC2=CC(=CC=C2)OCCNC3=NC4=CC=CC=C4O3</chem>               |
| 14022509 | CHEBI: 338063                   | -1.15 | <chem>C1=CC(=CC(=C1)N)C2=CSC(=N2)N=C(N)N</chem>                          |
| 14022517 | CHEBI: 338620                   | -2.15 | <chem>CCNC(=NCCSCC1=C(C=CC=N1)Br)NC#N</chem>                             |
| 14022519 | CHEBI: 145922                   | -1.54 | <chem>CN=C(NC#N)NC1=CC=CC(=C1)C2=CSC(=N2)N=C(N)N</chem>                  |
| 14211618 | 16a-fluoroestradiol             | -0.30 | <chem>CC12CCC3C(C1CC(C2O)F)CCC4=C3C=CC(=C4)O</chem>                      |
| 18356503 | MP 001-772-915                  | 0.35  | <chem>C(C(Cl)Br)C(F)F</chem>                                             |
| 22154175 | CID 22154175                    | 0.52  | <chem>CC1=CC=CC2=C1OC3=CC=CC=C3C4(C2CNCC4)O</chem>                       |
| 23235109 | CID 23235109                    | 0.27  | <chem>C(C(F)Br)C(F)F</chem>                                              |
| 40508074 | ZINC 05140934                   | 0.53  | <chem>C[NH2+][CCCN1C2=C(CCC3=CC=CC=C31)C=C(C=C2)O</chem>                 |
| 42251614 | ZINC 11886332                   | -0.58 | <chem>C1=CSC(=N1)CC[NH3+]</chem>                                         |
| 45268400 | 3-bromocytisine                 | -0.05 | <chem>C1C2CN(C1C3=CC=CC(=O)N3C2)Br</chem>                                |
