# Supplementary material for: Qualitative prediction of blood–brain barrier permeability on a large and refined dataset
Source: PubMed Central journal article supplement — J Comput Aided Mol Des. 2011 Nov 23;25(12):1095–106. doi: 10.1007/s10822-011-9478-1 (PMC3241963; doi:10.1007/s10822-011-9478-1), 2011-11-23
Supplement: 10822_2011_9478_MOESM2_ESM.pdf [file 10822_2011_9478_MOESM2_ESM.pdf]

Table 2: List of all descriptors used for feature selection. “Neutral” refer to the neutral form of the molecule, whereas “prot” refers to the protonated form.

|                     |                    |                     |
|---------------------|--------------------|---------------------|
| ACD_pKaMA           | prot_a_nC          | prot_logPow         |
| ACD_pKa1            | prot_a_nCl         | prot_logS           |
| ACD_pKa2            | prot_a_nF          | prot_mr             |
| prot_li             | prot_a_nH          | prot_mutagenic      |
| prot_n_ion          | prot_a_nI          | prot_nmol           |
| prot_n_pdN          | prot_a_nN          | prot_opr_brigid     |
| prot_n_pH           | prot_a_nO          | prot_opr_leadlike   |
| prot_n_PI           | prot_a_nP          | prot_opr_nring      |
| prot_n_pIN          | prot_a_nS          | prot_opr_nrot       |
| prot_n_pN           | prot_balabanJ      | prot_opr_violation  |
| prot_n_pol          | prot_BCUT_PEOE_0   | prot_PCplus         |
| prot_n_tautomers    | prot_BCUT_PEOE_1   | prot_PCminus        |
| prot_PDist          | prot_BCUT_PEOE_2   | prot_PEOE_PCplus    |
| prot_Qamines        | prot_BCUT_PEOE_3   | prot_PEOE_PCminus   |
| prot_QMAXN          | prot_BCUT_SLOGP_0  | prot_PEOE_RPCplus   |
| prot_QMAXneg        | prot_BCUT_SLOGP_1  | prot_PEOE_RPCminus  |
| prot_QMAXpos        | prot_BCUT_SLOGP_2  | prot_PEOE_VSAplus0  |
| prot_QMEANN         | prot_BCUT_SLOGP_3  | prot_PEOE_VSAplus1  |
| prot_QMINN          | prot_BCUT_SMR_0    | prot_PEOE_VSAplus2  |
| prot_QSUM           | prot_BCUT_SMR_1    | prot_PEOE_VSAplus3  |
| prot_QSUMH          | prot_BCUT_SMR_2    | prot_PEOE_VSAplus4  |
| prot_QSUMN          | prot_BCUT_SMR_3    | prot_PEOE_VSAplus5  |
| prot_QSUMneg        | prot_bpol          | prot_PEOE_VSAplus6  |
| prot_QSUMO          | prot_b_1rotN       | prot_PEOE_VSAminus0 |
| prot_QSUMpos        | prot_b_1rotR       | prot_PEOE_VSAminus1 |
| prot_mpc            | prot_b_ar          | prot_PEOE_VSAminus2 |
| neutral_I3          | prot_b_count       | prot_PEOE_VSAminus3 |
| neutral_li          | prot_b_double      | prot_PEOE_VSAminus4 |
| neutral_n_amines    | prot_b_heavy       | prot_PEOE_VSAminus5 |
| neutral_n_COOH      | prot_b_rotN        | prot_PEOE_VSAminus6 |
| neutral_n_hal       | prot_b_rotR        | prot_PEOE_VSA_FHYD  |
| neutral_n_ion       | prot_b_single      | prot_PEOE_VSA_FNEG  |
| neutral_n_OpN       | prot_b_triple      | prot_PEOE_VSA_FPNEG |
| neutral_n_pdN       | prot_chi0          | prot_PEOE_VSA_FPOL  |
| neutral_n_pH        | prot_chi0v         | prot_PEOE_VSA_FPOS  |
| neutral_n_PI        | prot_chi0v_C       | prot_PEOE_VSA_FPPOS |
| neutral_n_pIN       | prot_chi0_C        | prot_PEOE_VSA_HYD   |
| neutral_n_pN        | prot_chi1          | prot_PEOE_VSA_NEG   |
| neutral_n_pol       | prot_chi1v         | prot_PEOE_VSA_PNEG  |
| neutral_n_qN        | prot_chi1v_C       | prot_PEOE_VSA_POL   |
| neutral_n_tautomers | prot_chi1_C        | prot_PEOE_VSA_POS   |
| neutral_n_XpC       | prot_chiral        | prot_PEOE_VSA_PPOS  |
| neutral_PDist       | prot_chiral_u      | prot_petitjean      |
| neutral_Qamines     | prot_density       | prot_petitjeanSC    |
| neutral_QMAXN       | prot_diameter      | prot_pKa            |
| neutral_QMAXneg     | prot_Fcharge       | prot_Q_PCplus       |
| neutral_QMAXpos     | prot_GCUT_PEOE_0   | prot_Q_PCminus      |
| neutral_QMEANN      | prot_GCUT_PEOE_1   | prot_Q_RPCplus      |
| neutral_QMINN       | prot_GCUT_PEOE_2   | prot_Q_RPCminus     |
| neutral_QSUM        | prot_GCUT_PEOE_3   | prot_Q_VSA_FHYD     |
| neutral_QSUMH       | prot_GCUT_SLOGP_0  | prot_Q_VSA_FNEG     |
| neutral_QSUMN       | prot_GCUT_SLOGP_1  | prot_Q_VSA_FPNEG    |
| neutral_QSUMneg     | prot_GCUT_SLOGP_2  | prot_Q_VSA_FPOL     |
| neutral_QSUMO       | prot_GCUT_SLOGP_3  | prot_Q_VSA_FPOS     |
| neutral_QSUMpos     | prot_GCUT_SMR_0    | prot_Q_VSA_FPPOS    |
| neutral_mpc         | prot_GCUT_SMR_1    | prot_Q_VSA_HYD      |
| prot_apol           | prot_GCUT_SMR_2    | prot_Q_VSA_NEG      |
| prot_a_acc          | prot_GCUT_SMR_3    | prot_Q_VSA_PNEG     |
| prot_a_acid         | prot_Kier1         | prot_Q_VSA_POL      |
| prot_a_aro          | prot_Kier2         | prot_Q_VSA_POS      |
| prot_a_base         | prot_Kier3         | prot_Q_VSA_PPOS     |
| prot_a_count        | prot_KierA1        | prot_radius         |
| prot_a_don          | prot_KierA2        | prot_reactive       |
| prot_a_heavy        | prot_KierA3        | prot_rings          |
| prot_a_hyd          | prot_KierFlex      | prot_RPCplus        |
| prot_a_IC           | prot_lip_acc       | prot_RPCminus       |
| prot_a_ICM          | prot_lip_don       | prot_rsynth         |
| prot_a_nB           | prot_lip_druglike  | prot_SlogP          |
| prot_a_nBr          | prot_lip_violation | prot_SlogP_VSA0     |

|                      |
|----------------------|
| prot_SlogP_VSA1      |
| prot_SlogP_VSA2      |
| prot_SlogP_VSA3      |
| prot_SlogP_VSA4      |
| prot_SlogP_VSA5      |
| prot_SlogP_VSA6      |
| prot_SlogP_VSA7      |
| prot_SlogP_VSA8      |
| prot_SlogP_VSA9      |
| prot_SMR             |
| prot_SMR_VSA0        |
| prot_SMR_VSA1        |
| prot_SMR_VSA2        |
| prot_SMR_VSA3        |
| prot_SMR_VSA4        |
| prot_SMR_VSA5        |
| prot_SMR_VSA6        |
| prot_SMR_VSA7        |
| prot_TPSA            |
| prot_VAdjEq          |
| prot_VAdjMa          |
| prot_VDistEq         |
| prot_VDistMa         |
| prot_vdw_area        |
| prot_vdw_vol         |
| prot_vsa_acc         |
| prot_vsa_acid        |
| prot_vsa_base        |
| prot_vsa_don         |
| prot_vsa_hyd         |
| prot_vsa_other       |
| prot_vsa_pol         |
| prot_Weight          |
| prot_weinerPath      |
| prot_weinerPol       |
| prot_zagreb          |
| neutral_apol         |
| neutral_a_acc        |
| neutral_a_acid       |
| neutral_a_aro        |
| neutral_a_base       |
| neutral_a_count      |
| neutral_a_don        |
| neutral_a_heavy      |
| neutral_a_hyd        |
| neutral_a_IC         |
| neutral_a_ICM        |
| neutral_a_nB         |
| neutral_a_nBr        |
| neutral_a_nC         |
| neutral_a_nCl        |
| neutral_a_nF         |
| neutral_a_nH         |
| neutral_a_nI         |
| neutral_a_nN         |
| neutral_a_nO         |
| neutral_a_nP         |
| neutral_a_nS         |
| neutral_balabanJ     |
| neutral_BCUT_PEOE_0  |
| neutral_BCUT_PEOE_1  |
| neutral_BCUT_PEOE_2  |
| neutral_BCUT_PEOE_3  |
| neutral_BCUT_SLOGP_0 |
| neutral_BCUT_SLOGP_1 |
| neutral_BCUT_SLOGP_2 |
| neutral_BCUT_SLOGP_3 |
| neutral_BCUT_SMR_0   |
| neutral_BCUT_SMR_1   |
| neutral_BCUT_SMR_2   |
| neutral_BCUT_SMR_3   |
| neutral_bpol         |
| neutral_b_1rotN      |

|                        |
|------------------------|
| neutral_b_1rotR        |
| neutral_b_ar           |
| neutral_b_count        |
| neutral_b_double       |
| neutral_b_heavy        |
| neutral_b_rotN         |
| neutral_b_rotR         |
| neutral_b_single       |
| neutral_b_triple       |
| neutral_chi0           |
| neutral_chi0v          |
| neutral_chi0v_C        |
| neutral_chi0_C         |
| neutral_chi1           |
| neutral_chi1v          |
| neutral_chi1v_C        |
| neutral_chi1_C         |
| neutral_chiral         |
| neutral_chiral_u       |
| neutral_density        |
| neutral_diameter       |
| neutral_FCharge        |
| neutral_GCUT_PEOE_0    |
| neutral_GCUT_PEOE_1    |
| neutral_GCUT_PEOE_2    |
| neutral_GCUT_PEOE_3    |
| neutral_GCUT_SLOGP_0   |
| neutral_GCUT_SLOGP_1   |
| neutral_GCUT_SLOGP_2   |
| neutral_GCUT_SLOGP_3   |
| neutral_GCUT_SMR_0     |
| neutral_GCUT_SMR_1     |
| neutral_GCUT_SMR_2     |
| neutral_GCUT_SMR_3     |
| neutral_Kier1          |
| neutral_Kier2          |
| neutral_Kier3          |
| neutral_KierA1         |
| neutral_KierA2         |
| neutral_KierA3         |
| neutral_KierFlex       |
| neutral_lip_acc        |
| neutral_lip_don        |
| neutral_lip_druglike   |
| neutral_lip_violation  |
| neutral_logPow         |
| neutral_logS           |
| neutral_mr             |
| neutral_mutagenic      |
| neutral_nmol           |
| neutral_opr_brigid     |
| neutral_opr_leadlike   |
| neutral_opr_nring      |
| neutral_opr_nrot       |
| neutral_opr_violation  |
| neutral_PCplus         |
| neutral_PCminus        |
| neutral_PEOE_PCplus    |
| neutral_PEOE_PCminus   |
| neutral_PEOE_RPCplus   |
| neutral_PEOE_RPCminus  |
| neutral_PEOE_VSAplus0  |
| neutral_PEOE_VSAplus1  |
| neutral_PEOE_VSAplus2  |
| neutral_PEOE_VSAplus3  |
| neutral_PEOE_VSAplus4  |
| neutral_PEOE_VSAplus5  |
| neutral_PEOE_VSAplus6  |
| neutral_PEOE_VSAminus0 |
| neutral_PEOE_VSAminus1 |
| neutral_PEOE_VSAminus2 |
| neutral_PEOE_VSAminus3 |
| neutral_PEOE_VSAminus4 |

|                        |
|------------------------|
| neutral_PEOE_VSAminus5 |
| neutral_PEOE_VSAminus6 |
| neutral_PEOE_VSA_FHYD  |
| neutral_PEOE_VSA_FNEG  |
| neutral_PEOE_VSA_FPNEG |
| neutral_PEOE_VSA_FPOL  |
| neutral_PEOE_VSA_FPOS  |
| neutral_PEOE_VSA_FPPOS |
| neutral_PEOE_VSA_HYD   |
| neutral_PEOE_VSA_NEG   |
| neutral_PEOE_VSA_PNEG  |
| neutral_PEOE_VSA_POL   |
| neutral_PEOE_VSA_POS   |
| neutral_PEOE_VSA_PPOS  |
| neutral_petitjean      |
| neutral_petitjeanSC    |
| neutral_pKa            |
| neutral_Q_PCplus       |
| neutral_Q_PCminus      |
| neutral_Q_RPCplus      |
| neutral_Q_RPCminus     |
| neutral_Q_VSA_FHYD     |
| neutral_Q_VSA_FNEG     |
| neutral_Q_VSA_FPNEG    |
| neutral_Q_VSA_FPOL     |
| neutral_Q_VSA_FPOS     |
| neutral_Q_VSA_FPPOS    |
| neutral_Q_VSA_HYD      |
| neutral_Q_VSA_NEG      |
| neutral_Q_VSA_PNEG     |
| neutral_Q_VSA_POL      |
| neutral_Q_VSA_POS      |
| neutral_Q_VSA_PPOS     |
| neutral_radius         |
| neutral_reactive       |
| neutral_rings          |
| neutral_RPCplus        |
| neutral_RPCminus       |
| neutral_rsynth         |
| neutral_SlogP          |
| neutral_SlogP_VSA0     |
| neutral_SlogP_VSA1     |
| neutral_SlogP_VSA2     |
| neutral_SlogP_VSA3     |
| neutral_SlogP_VSA4     |
| neutral_SlogP_VSA5     |
| neutral_SlogP_VSA6     |
| neutral_SlogP_VSA7     |
| neutral_SlogP_VSA8     |
| neutral_SlogP_VSA9     |
| neutral_SMR            |
| neutral_SMR_VSA0       |
| neutral_SMR_VSA1       |
| neutral_SMR_VSA2       |
| neutral_SMR_VSA3       |
| neutral_SMR_VSA4       |
| neutral_SMR_VSA5       |
| neutral_SMR_VSA6       |
| neutral_SMR_VSA7       |
| neutral_TPSA           |
| neutral_VAdjEq         |
| neutral_VAdjMa         |
| neutral_VDistEq        |
| neutral_VDistMa        |
| neutral_vdw_area       |
| neutral_vdw_vol        |
| neutral_vsa_acc        |
| neutral_vsa_acid       |
| neutral_vsa_base       |
| neutral_vsa_don        |
| neutral_vsa_hyd        |
| neutral_vsa_other      |
| neutral_vsa_pol        |

|                               |
|-------------------------------|
| neutral_Weight                |
| neutral_weinerPath            |
| neutral_weinerPol             |
| neutral_zagreb                |
| RotatableBondCount            |
| MolecularWeight               |
| TotalFormalCharge             |
| HydrogenBondDonorCount        |
| HydrogenBondAcceptorCount     |
| Complexity                    |
| HeavyAtomCount                |
| AtomChiralCount               |
| TPSA                          |
| ACD_pKa1_plus_pKa2            |
| ACD_pKa1_plus_pKa2mod         |
| prot_logPow_logWeight         |
| neutral_logPow_logWeight      |
| si_Weight_ACD_pKaMA           |
| si_Weight_ACD_pKa1            |
| si_Weight_ACD_pKa2            |
| si_Weight_prot_li             |
| si_Weight_prot_n_ion          |
| si_Weight_prot_n_pdN          |
| si_Weight_prot_n_pH           |
| si_Weight_prot_n_PI           |
| si_Weight_prot_n_pIN          |
| si_Weight_prot_n_pN           |
| si_Weight_prot_n_pol          |
| si_Weight_prot_n_tautomers    |
| si_Weight_prot_PDist          |
| si_Weight_prot_Qamines        |
| si_Weight_prot_QMAXN          |
| si_Weight_prot_QMAXneg        |
| si_Weight_prot_QMAXpos        |
| si_Weight_prot_QMEANN         |
| si_Weight_prot_QMINN          |
| si_Weight_prot_QSUM           |
| si_Weight_prot_QSUMH          |
| si_Weight_prot_QSUMN          |
| si_Weight_prot_QSUMneg        |
| si_Weight_prot_QSUMO          |
| si_Weight_prot_QSUMpos        |
| si_Weight_prot_mpc            |
| si_Weight_neutral_I3          |
| si_Weight_neutral_li          |
| si_Weight_neutral_n_amines    |
| si_Weight_neutral_n_COOH      |
| si_Weight_neutral_n_hal       |
| si_Weight_neutral_n_ion       |
| si_Weight_neutral_n_OpN       |
| si_Weight_neutral_n_pdN       |
| si_Weight_neutral_n_pH        |
| si_Weight_neutral_n_PI        |
| si_Weight_neutral_n_pIN       |
| si_Weight_neutral_n_pN        |
| si_Weight_neutral_n_pol       |
| si_Weight_neutral_n_qN        |
| si_Weight_neutral_n_tautomers |
| si_Weight_neutral_n_XpC       |
| si_Weight_neutral_PDist       |
| si_Weight_neutral_Qamines     |
| si_Weight_neutral_QMAXN       |
| si_Weight_neutral_QMAXneg     |
| si_Weight_neutral_QMAXpos     |
| si_Weight_neutral_QMEANN      |
| si_Weight_neutral_QMINN       |
| si_Weight_neutral_QSUM        |
| si_Weight_neutral_QSUMH       |
| si_Weight_neutral_QSUMN       |
| si_Weight_neutral_QSUMneg     |
| si_Weight_neutral_QSUMO       |
| si_Weight_neutral_QSUMpos     |
| si_Weight_neutral_mpc         |

|                             |
|-----------------------------|
| si_Weight_prot_apol         |
| si_Weight_prot_a_acc        |
| si_Weight_prot_a_acid       |
| si_Weight_prot_a_aro        |
| si_Weight_prot_a_base       |
| si_Weight_prot_a_count      |
| si_Weight_prot_a_don        |
| si_Weight_prot_a_heavy      |
| si_Weight_prot_a_hyd        |
| si_Weight_prot_a_IC         |
| si_Weight_prot_a_ICM        |
| si_Weight_prot_a_nB         |
| si_Weight_prot_a_nBr        |
| si_Weight_prot_a_nC         |
| si_Weight_prot_a_nCl        |
| si_Weight_prot_a_nF         |
| si_Weight_prot_a_nH         |
| si_Weight_prot_a_nI         |
| si_Weight_prot_a_nN         |
| si_Weight_prot_a_nO         |
| si_Weight_prot_a_nP         |
| si_Weight_prot_a_nS         |
| si_Weight_prot_balabanJ     |
| si_Weight_prot_BCUT_PEOE_0  |
| si_Weight_prot_BCUT_PEOE_1  |
| si_Weight_prot_BCUT_PEOE_2  |
| si_Weight_prot_BCUT_PEOE_3  |
| si_Weight_prot_BCUT_SLOGP_0 |
| si_Weight_prot_BCUT_SLOGP_1 |
| si_Weight_prot_BCUT_SLOGP_2 |
| si_Weight_prot_BCUT_SLOGP_3 |
| si_Weight_prot_BCUT_SMR_0   |
| si_Weight_prot_BCUT_SMR_1   |
| si_Weight_prot_BCUT_SMR_2   |
| si_Weight_prot_BCUT_SMR_3   |
| si_Weight_prot_bpol         |
| si_Weight_prot_b_1rotN      |
| si_Weight_prot_b_1rotR      |
| si_Weight_prot_b_ar         |
| si_Weight_prot_b_count      |
| si_Weight_prot_b_double     |
| si_Weight_prot_b_heavy      |
| si_Weight_prot_b_rotN       |
| si_Weight_prot_b_rotR       |
| si_Weight_prot_b_single     |
| si_Weight_prot_b_triple     |
| si_Weight_prot_chi0         |
| si_Weight_prot_chi0v        |
| si_Weight_prot_chi0v_C      |
| si_Weight_prot_chi0_C       |
| si_Weight_prot_chi1         |
| si_Weight_prot_chi1v        |
| si_Weight_prot_chi1v_C      |
| si_Weight_prot_chi1_C       |
| si_Weight_prot_chiral       |
| si_Weight_prot_chiral_u     |
| si_Weight_prot_density      |
| si_Weight_prot_diameter     |
| si_Weight_prot_FCharge      |
| si_Weight_prot_GCUT_PEOE_0  |
| si_Weight_prot_GCUT_PEOE_1  |
| si_Weight_prot_GCUT_PEOE_2  |
| si_Weight_prot_GCUT_PEOE_3  |
| si_Weight_prot_GCUT_SLOGP_0 |
| si_Weight_prot_GCUT_SLOGP_1 |
| si_Weight_prot_GCUT_SLOGP_2 |
| si_Weight_prot_GCUT_SLOGP_3 |
| si_Weight_prot_GCUT_SMR_0   |
| si_Weight_prot_GCUT_SMR_1   |
| si_Weight_prot_GCUT_SMR_2   |
| si_Weight_prot_GCUT_SMR_3   |
| si_Weight_prot_Kier1        |
| si_Weight_prot_Kier2        |

|                               |
|-------------------------------|
| si_Weight_prot_Kier3          |
| si_Weight_prot_KierA1         |
| si_Weight_prot_KierA2         |
| si_Weight_prot_KierA3         |
| si_Weight_prot_KierFlex       |
| si_Weight_prot_lip_acc        |
| si_Weight_prot_lip_don        |
| si_Weight_prot_lip_druglike   |
| si_Weight_prot_lip_violation  |
| si_Weight_prot_logPow         |
| si_Weight_prot_logS           |
| si_Weight_prot_mr             |
| si_Weight_prot_mutagenic      |
| si_Weight_prot_nmol           |
| si_Weight_prot_opr_brigid     |
| si_Weight_prot_opr_leadlike   |
| si_Weight_prot_opr_nring      |
| si_Weight_prot_opr_nrot       |
| si_Weight_prot_opr_violation  |
| si_Weight_prot_PCplus         |
| si_Weight_prot_PCminus        |
| si_Weight_prot_PEOE_PCplus    |
| si_Weight_prot_PEOE_PCminus   |
| si_Weight_prot_PEOE_RPCplus   |
| si_Weight_prot_PEOE_RPCminus  |
| si_Weight_prot_PEOE_VSAplus0  |
| si_Weight_prot_PEOE_VSAplus1  |
| si_Weight_prot_PEOE_VSAplus2  |
| si_Weight_prot_PEOE_VSAplus3  |
| si_Weight_prot_PEOE_VSAplus4  |
| si_Weight_prot_PEOE_VSAplus5  |
| si_Weight_prot_PEOE_VSAplus6  |
| si_Weight_prot_PEOE_VSAminus0 |
| si_Weight_prot_PEOE_VSAminus1 |
| si_Weight_prot_PEOE_VSAminus2 |
| si_Weight_prot_PEOE_VSAminus3 |
| si_Weight_prot_PEOE_VSAminus4 |
| si_Weight_prot_PEOE_VSAminus5 |
| si_Weight_prot_PEOE_VSAminus6 |
| si_Weight_prot_PEOE_VSA_FHYD  |
| si_Weight_prot_PEOE_VSA_FNEG  |
| si_Weight_prot_PEOE_VSA_FPNEG |
| si_Weight_prot_PEOE_VSA_FPOL  |
| si_Weight_prot_PEOE_VSA_FPOS  |
| si_Weight_prot_PEOE_VSA_FPPOS |
| si_Weight_prot_PEOE_VSA_HYD   |
| si_Weight_prot_PEOE_VSA_NEG   |
| si_Weight_prot_PEOE_VSA_PNEG  |
| si_Weight_prot_PEOE_VSA_POL   |
| si_Weight_prot_PEOE_VSA_POS   |
| si_Weight_prot_PEOE_VSA_PPOS  |
| si_Weight_prot_petitjean      |
| si_Weight_prot_petitjeanSC    |
| si_Weight_prot_pKa            |
| si_Weight_prot_Q_PCplus       |
| si_Weight_prot_Q_PCminus      |
| si_Weight_prot_Q_RPCplus      |
| si_Weight_prot_Q_RPCminus     |
| si_Weight_prot_Q_VSA_FHYD     |
| si_Weight_prot_Q_VSA_FNEG     |
| si_Weight_prot_Q_VSA_FPNEG    |
| si_Weight_prot_Q_VSA_FPOL     |
| si_Weight_prot_Q_VSA_FPOS     |
| si_Weight_prot_Q_VSA_FPPOS    |
| si_Weight_prot_Q_VSA_HYD      |
| si_Weight_prot_Q_VSA_NEG      |
| si_Weight_prot_Q_VSA_PNEG     |
| si_Weight_prot_Q_VSA_POL      |
| si_Weight_prot_Q_VSA_POS      |
| si_Weight_prot_Q_VSA_PPOS     |
| si_Weight_prot_radius         |
| si_Weight_prot_reactive       |
| si_Weight_prot_rings          |

|                                |
|--------------------------------|
| si_Weight_prot_RPCplus         |
| si_Weight_prot_RPCminus        |
| si_Weight_prot_rsynth          |
| si_Weight_prot_SlogP           |
| si_Weight_prot_SlogP_VSA0      |
| si_Weight_prot_SlogP_VSA1      |
| si_Weight_prot_SlogP_VSA2      |
| si_Weight_prot_SlogP_VSA3      |
| si_Weight_prot_SlogP_VSA4      |
| si_Weight_prot_SlogP_VSA5      |
| si_Weight_prot_SlogP_VSA6      |
| si_Weight_prot_SlogP_VSA7      |
| si_Weight_prot_SlogP_VSA8      |
| si_Weight_prot_SlogP_VSA9      |
| si_Weight_prot_SMR             |
| si_Weight_prot_SMR_VSA0        |
| si_Weight_prot_SMR_VSA1        |
| si_Weight_prot_SMR_VSA2        |
| si_Weight_prot_SMR_VSA3        |
| si_Weight_prot_SMR_VSA4        |
| si_Weight_prot_SMR_VSA5        |
| si_Weight_prot_SMR_VSA6        |
| si_Weight_prot_SMR_VSA7        |
| si_Weight_prot_TPSA            |
| si_Weight_prot_VAdjEq          |
| si_Weight_prot_VAdjMa          |
| si_Weight_prot_VDistEq         |
| si_Weight_prot_VDistMa         |
| si_Weight_prot_vdw_area        |
| si_Weight_prot_vdw_vol         |
| si_Weight_prot_vsa_acc         |
| si_Weight_prot_vsa_acid        |
| si_Weight_prot_vsa_base        |
| si_Weight_prot_vsa_don         |
| si_Weight_prot_vsa_hyd         |
| si_Weight_prot_vsa_other       |
| si_Weight_prot_vsa_pol         |
| si_Weight_prot_Weight          |
| si_Weight_prot_weinerPath      |
| si_Weight_prot_weinerPol       |
| si_Weight_prot_zagreb          |
| si_Weight_neutral_apol         |
| si_Weight_neutral_a_acc        |
| si_Weight_neutral_a_acid       |
| si_Weight_neutral_a_aro        |
| si_Weight_neutral_a_base       |
| si_Weight_neutral_a_count      |
| si_Weight_neutral_a_don        |
| si_Weight_neutral_a_heavy      |
| si_Weight_neutral_a_hyd        |
| si_Weight_neutral_a_IC         |
| si_Weight_neutral_a_ICM        |
| si_Weight_neutral_a_nB         |
| si_Weight_neutral_a_nBr        |
| si_Weight_neutral_a_nC         |
| si_Weight_neutral_a_nCl        |
| si_Weight_neutral_a_nF         |
| si_Weight_neutral_a_nH         |
| si_Weight_neutral_a_nI         |
| si_Weight_neutral_a_nN         |
| si_Weight_neutral_a_nO         |
| si_Weight_neutral_a_nP         |
| si_Weight_neutral_a_nS         |
| si_Weight_neutral_balabanJ     |
| si_Weight_neutral_BCUT_PEOE_0  |
| si_Weight_neutral_BCUT_PEOE_1  |
| si_Weight_neutral_BCUT_PEOE_2  |
| si_Weight_neutral_BCUT_PEOE_3  |
| si_Weight_neutral_BCUT_SLOGP_0 |
| si_Weight_neutral_BCUT_SLOGP_1 |
| si_Weight_neutral_BCUT_SLOGP_2 |
| si_Weight_neutral_BCUT_SLOGP_3 |
| si_Weight_neutral_BCUT_SMR_0   |

|                                 |
|---------------------------------|
| si_Weight_neutral_BCUT_SMR_1    |
| si_Weight_neutral_BCUT_SMR_2    |
| si_Weight_neutral_BCUT_SMR_3    |
| si_Weight_neutral_bp0l          |
| si_Weight_neutral_b_1rotN       |
| si_Weight_neutral_b_1rotR       |
| si_Weight_neutral_b_ar          |
| si_Weight_neutral_b_count       |
| si_Weight_neutral_b_double      |
| si_Weight_neutral_b_heavy       |
| si_Weight_neutral_b_rotN        |
| si_Weight_neutral_b_rotR        |
| si_Weight_neutral_b_single      |
| si_Weight_neutral_b_triple      |
| si_Weight_neutral_chi0          |
| si_Weight_neutral_chi0v         |
| si_Weight_neutral_chi0v_C       |
| si_Weight_neutral_chi0_C        |
| si_Weight_neutral_chi1          |
| si_Weight_neutral_chi1v         |
| si_Weight_neutral_chi1v_C       |
| si_Weight_neutral_chi1_C        |
| si_Weight_neutral_chiral        |
| si_Weight_neutral_chiral_u      |
| si_Weight_neutral_density       |
| si_Weight_neutral_diameter      |
| si_Weight_neutral_FCharge       |
| si_Weight_neutral_GCUT_PEOE_0   |
| si_Weight_neutral_GCUT_PEOE_1   |
| si_Weight_neutral_GCUT_PEOE_2   |
| si_Weight_neutral_GCUT_PEOE_3   |
| si_Weight_neutral_GCUT_SLOGP_0  |
| si_Weight_neutral_GCUT_SLOGP_1  |
| si_Weight_neutral_GCUT_SLOGP_2  |
| si_Weight_neutral_GCUT_SLOGP_3  |
| si_Weight_neutral_GCUT_SMR_0    |
| si_Weight_neutral_GCUT_SMR_1    |
| si_Weight_neutral_GCUT_SMR_2    |
| si_Weight_neutral_GCUT_SMR_3    |
| si_Weight_neutral_Kier1         |
| si_Weight_neutral_Kier2         |
| si_Weight_neutral_Kier3         |
| si_Weight_neutral_KierA1        |
| si_Weight_neutral_KierA2        |
| si_Weight_neutral_KierA3        |
| si_Weight_neutral_KierFlex      |
| si_Weight_neutral_lip_acc       |
| si_Weight_neutral_lip_don       |
| si_Weight_neutral_lip_druglike  |
| si_Weight_neutral_lip_violation |
| si_Weight_neutral_logPow        |
| si_Weight_neutral_logS          |
| si_Weight_neutral_mr            |
| si_Weight_neutral_mutagenic     |
| si_Weight_neutral_nm0l          |
| si_Weight_neutral_opr_brigid    |
| si_Weight_neutral_opr_leadlike  |
| si_Weight_neutral_opr_nring     |
| si_Weight_neutral_opr_nrot      |
| si_Weight_neutral_opr_violation |
| si_Weight_neutral_PCplus        |
| si_Weight_neutral_PCminus       |
| si_Weight_neutral_PEOE_PCplus   |
| si_Weight_neutral_PEOE_PCminus  |
| si_Weight_neutral_PEOE_RPCplus  |
| si_Weight_neutral_PEOE_RPCminus |
| si_Weight_neutral_PEOE_VSAplus0 |
| si_Weight_neutral_PEOE_VSAplus1 |
| si_Weight_neutral_PEOE_VSAplus2 |
| si_Weight_neutral_PEOE_VSAplus3 |
| si_Weight_neutral_PEOE_VSAplus4 |
| si_Weight_neutral_PEOE_VSAplus5 |
| si_Weight_neutral_PEOE_VSAplus6 |

|                                  |
|----------------------------------|
| si_Weight_neutral_PEOE_VSAminus0 |
| si_Weight_neutral_PEOE_VSAminus1 |
| si_Weight_neutral_PEOE_VSAminus2 |
| si_Weight_neutral_PEOE_VSAminus3 |
| si_Weight_neutral_PEOE_VSAminus4 |
| si_Weight_neutral_PEOE_VSAminus5 |
| si_Weight_neutral_PEOE_VSAminus6 |
| si_Weight_neutral_PEOE_VSA_FHYD  |
| si_Weight_neutral_PEOE_VSA_FNE   |
| si_Weight_neutral_PEOE_VSA_FPNE  |
| si_Weight_neutral_PEOE_VSA_FPNE  |
| si_Weight_neutral_PEOE_VSA_FPOL  |
| si_Weight_neutral_PEOE_VSA_FPOS  |
| si_Weight_neutral_PEOE_VSA_FPPO  |
| si_Weight_neutral_PEOE_VSA_FPOS  |
| si_Weight_neutral_PEOE_VSA_HYD   |
| si_Weight_neutral_PEOE_VSA_NEG   |
| si_Weight_neutral_PEOE_VSA_PNE   |
| si_Weight_neutral_PEOE_VSA_POL   |
| si_Weight_neutral_PEOE_VSA_POS   |
| si_Weight_neutral_PEOE_VSA_PPOS  |
| si_Weight_neutral_petitjean      |
| si_Weight_neutral_petitjeanSC    |
| si_Weight_neutral_pKa            |
| si_Weight_neutral_Q_PCplus       |
| si_Weight_neutral_Q_PCminus      |
| si_Weight_neutral_Q_RPCplus      |
| si_Weight_neutral_Q_RPCminus     |
| si_Weight_neutral_Q_VSA_FHYD     |
| si_Weight_neutral_Q_VSA_FNEG     |
| si_Weight_neutral_Q_VSA_FPNEG    |
| si_Weight_neutral_Q_VSA_FPOL     |
| si_Weight_neutral_Q_VSA_FPOS     |
| si_Weight_neutral_Q_VSA_FPPOS    |
| si_Weight_neutral_Q_VSA_HYD      |
| si_Weight_neutral_Q_VSA_NEG      |
| si_Weight_neutral_Q_VSA_PNEG     |
| si_Weight_neutral_Q_VSA_POL      |
| si_Weight_neutral_Q_VSA_POS      |
| si_Weight_neutral_Q_VSA_PPOS     |
| si_Weight_neutral_radius         |
| si_Weight_neutral_reactive       |
| si_Weight_neutral_rings          |
| si_Weight_neutral_RPCplus        |
| si_Weight_neutral_RPCminus       |
| si_Weight_neutral_rsynth         |
| si_Weight_neutral_SlogP          |
| si_Weight_neutral_SlogP_VSA0     |
| si_Weight_neutral_SlogP_VSA1     |
| si_Weight_neutral_SlogP_VSA2     |
| si_Weight_neutral_SlogP_VSA3     |
| si_Weight_neutral_SlogP_VSA4     |
| si_Weight_neutral_SlogP_VSA5     |
| si_Weight_neutral_SlogP_VSA6     |
| si_Weight_neutral_SlogP_VSA7     |
| si_Weight_neutral_SlogP_VSA8     |
| si_Weight_neutral_SlogP_VSA9     |
| si_Weight_neutral_SMR            |
| si_Weight_neutral_SMR_VSA0       |
| si_Weight_neutral_SMR_VSA1       |
| si_Weight_neutral_SMR_VSA2       |
| si_Weight_neutral_SMR_VSA3       |
| si_Weight_neutral_SMR_VSA4       |
| si_Weight_neutral_SMR_VSA5       |
| si_Weight_neutral_SMR_VSA6       |
| si_Weight_neutral_SMR_VSA7       |
| si_Weight_neutral_TPSA           |
| si_Weight_neutral_VAdjEq         |
| si_Weight_neutral_VAdjMa         |
| si_Weight_neutral_VDistEq        |

|                             |
|-----------------------------|
| si_Weight_neutral_VDistMa   |
| si_Weight_neutral_vdw_area  |
| si_Weight_neutral_vdw_vol   |
| si_Weight_neutral_vsa_acc   |
| si_Weight_neutral_vsa_acid  |
| si_Weight_neutral_vsa_base  |
| si_Weight_neutral_vsa_don   |
| si_Weight_neutral_vsa_hyd   |
| si_Weight_neutral_vsa_other |
| si_Weight_neutral_vsa_pol   |

|                                     |
|-------------------------------------|
| si_Weight_neutral_Weight            |
| si_Weight_neutral_weinerPath        |
| si_Weight_neutral_weinerPol         |
| si_Weight_neutral_zagreb            |
| si_Weight_RotatableBondCount        |
| si_Weight_MolecularWeight           |
| si_Weight_TotalFormalCharge         |
| si_Weight_HydrogenBondDonorCount    |
| si_Weight_HydrogenBondAcceptorCount |

|                                    |
|------------------------------------|
| si_Weight_Complexity               |
| si_Weight_HeavyAtomCount           |
| si_Weight_AtomChiralCount          |
| si_Weight_TPSA                     |
| si_Weight_ACD_pKa1_plus_pKa2       |
| si_Weight_ACD_pKa1_plus_pKa2mod    |
| si_Weight_prot_logPow_logWeight    |
| si_Weight_neutral_logPow_logWeight |
